# Supplementary material for: Air quality and climate change, Topic 3 of the Model Inter-Comparison Study for Asia Phase III (MICS-Asia III) – Part 2: aerosol radiative effects and aerosol feedbacks
Source: Copernicus journal article supplement (doi:10.5194/acp-20-1147-2020), 2020-01-30
Supplement: Supplementary file 1 [file acp-20-1147-2020-supplement.pdf]

Supplement of Atmos. Chem. Phys., 20, 1147–1161, 2020  
<https://doi.org/10.5194/acp-20-1147-2020-supplement>  
© Author(s) 2020. This work is distributed under  
the Creative Commons Attribution 4.0 License.

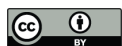

*Supplement of*

**Air quality and climate change, Topic 3 of the Model  
Inter-Comparison Study for Asia Phase III (MICS-Asia III)  
– Part 2: aerosol radiative effects and aerosol feedbacks**

**Meng Gao et al.**

*Correspondence to:* Meng Gao ([mmgao2@hkbu.edu.hk](mailto:mmgao2@hkbu.edu.hk)), Zhiwei Han ([hzw@mail.iap.ac.cn](mailto:hzw@mail.iap.ac.cn)),  
and Gregory R. Carmichael ([gcarmich@engineering.uiowa.edu](mailto:gcarmich@engineering.uiowa.edu))

The copyright of individual parts of the supplement might differ from the CC BY 4.0 License.

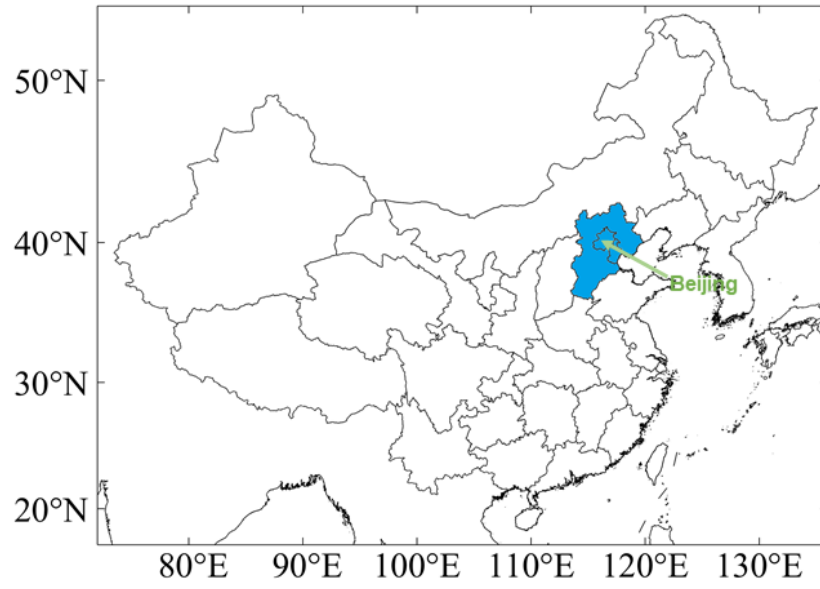

Figure S1. The Beijing-Tianjin-Hebei region is marked with blue and Beijing is shown with green arrow.
